# Supplementary material for: Synergism in Two-Component Insecticides with Dillapiole against Fall Armyworm
Source: MDPI journal article supplement (doi:10.3390/plants12173042), 2023-08-24
Supplement: s1 [file s1]

## Synergism in two-component insecticides with dillapiole against fall armyworm

Murilo Fazolin <sup>1,\*</sup>, Humberto R. Bizzo <sup>2,\*</sup>, André F. M. Monteiro <sup>1</sup>, Maria E. C. Lima <sup>3</sup>, Natalia S. Maisforte <sup>4</sup> and Paola E. Gama <sup>2</sup>

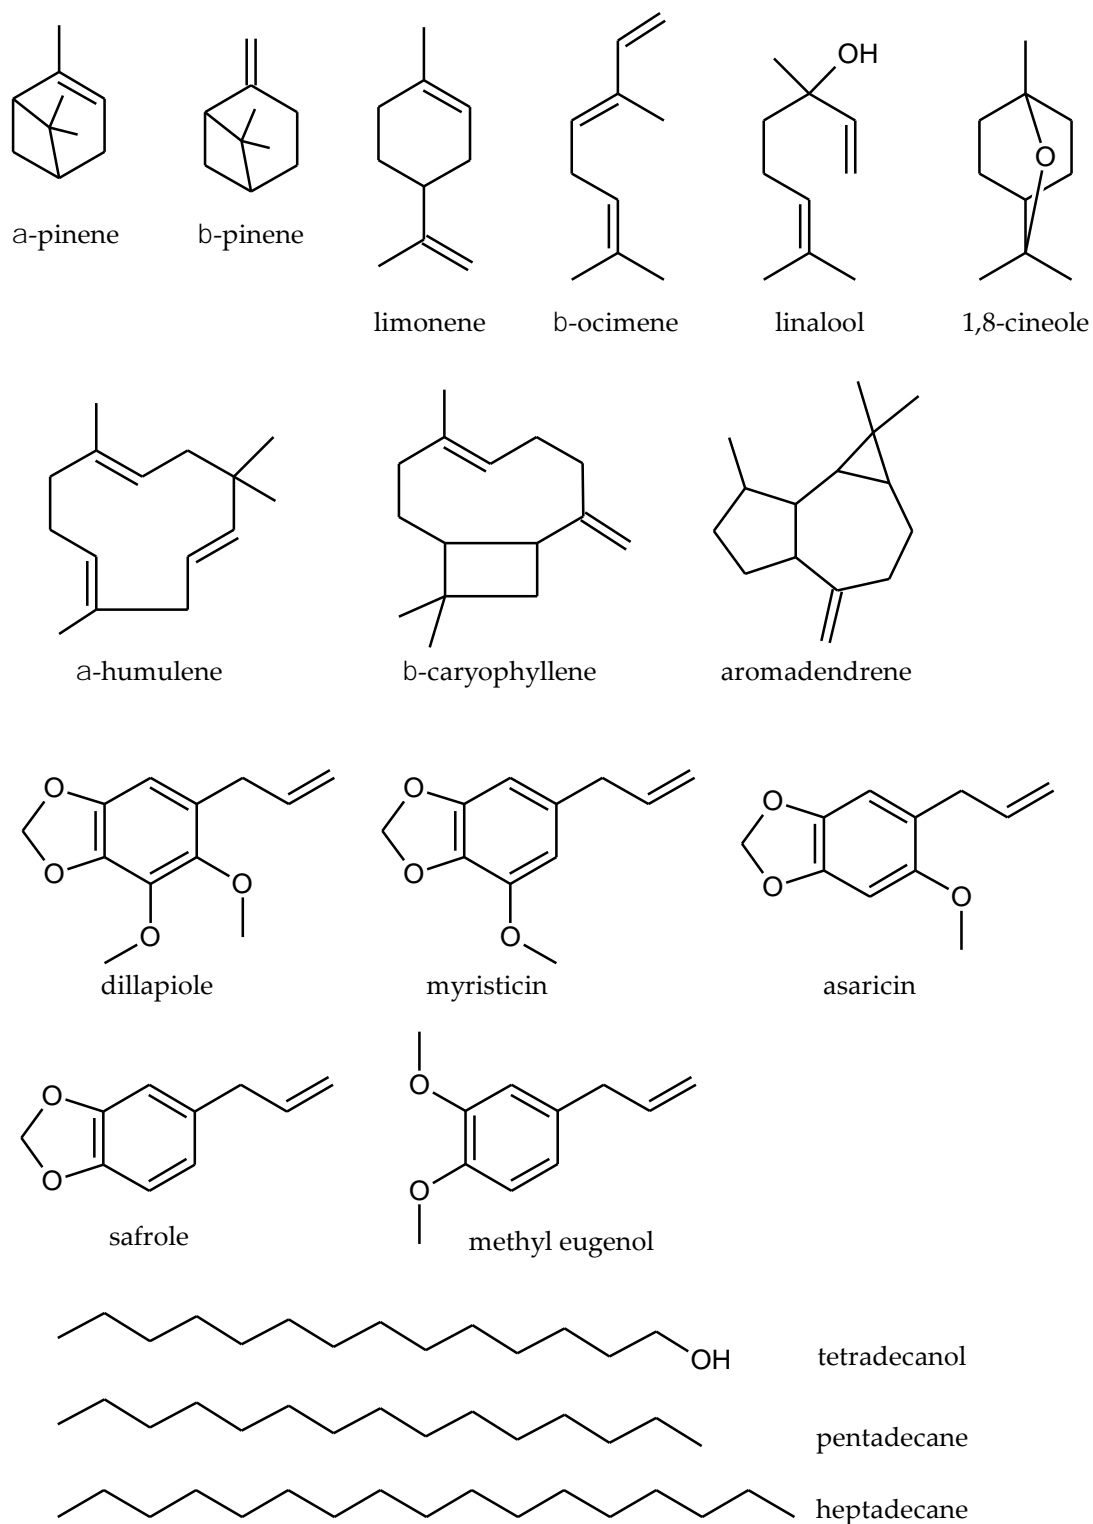

Figure S1. Structural formula of the compounds tested.

**Table S1.** Lethal doses (LD<sub>50</sub>) with confidence intervals for individual tested compounds to *S. frugiperda* third instar larvae.

| Compounds       | LD <sub>50</sub> (95% CI)<br>(ppm) | DF | Prob.<br>$\chi^2$ | Pearson<br>$\chi^2$ | R <sup>2</sup> | Angular<br>Coefficient<br>± SEM |
|-----------------|------------------------------------|----|-------------------|---------------------|----------------|---------------------------------|
| dillapiole      | 0.35 (0.29 - 0.40)                 | 22 | 0.7040            | 18.0332             | 0.72           | 1.17 ± 0.15                     |
| myristicin      | 0.62 (0.58 - 0.66)                 | 18 | 0.8764            | 11.4053             | 0.88           | 1.84 ± 0.16                     |
| asaricin        | 0.95 (0.55 - 1.41)                 | 26 | 0.3946            | 24.4778             | 0.66           | 0.33 ± 0.05                     |
| tetradecanol    | 1.59 (1.44 - 1.74)                 | 22 | 0.4554            | 22.0761             | 0.79           | 0.93 ± 0.10                     |
| safrole         | 2.02 (1.89 - 2.15)                 | 26 | 0.5895            | 23.7626             | 0.81           | 2.05 ± 0.20                     |
| methyl eugenol  | 2.28 (2.00 - 2.68)                 | 22 | 0.3867            | 23.2679             | 0.82           | 1.03 ± 0.10                     |
| linalool        | 2.71 (2.43 - 2.98)                 | 38 | 0.1225            | 48.1414             | 0.85           | 0.90 ± 0.06                     |
| pentadecane     | 3.81 (3.50 - 4.15)                 | 18 | 0.7978            | 12.8948             | 0.89           | 1.85 ± 0.15                     |
| 1,8-cineole     | 3.91 (3.44 - 4.39)                 | 34 | 0.9993            | 1.6763              | 0.88           | 0.94 ± 0.06                     |
| aromadendrene   | 4.24 (3.45 - 5.39)                 | 18 | 0.2576            | 21.4431             | 0.75           | 0.64 ± 0.09                     |
| α-humulene      | 4.94 (4.12 - 5.67)                 | 20 | 0.1034            | 28.2604             | 0.75           | 0.83 ± 0.11                     |
| β-caryophyllene | 6.24 (4.49 - 8.93)                 | 16 | 0.6323            | 13.5492             | 0.80           | 0.49 ± 0.06                     |
| limonene        | 6.41 (5.95 - 6.92)                 | 46 | 0.9988            | 16.6017             | 0.86           | 1.33 ± 0.08                     |
| heptadecane     | 7.17 (3.88 - 17.45)                | 13 | 0.7230            | 9.6409              | 0.73           | 0.29 ± 0.05                     |
| α-pinene        | 8.21 (6.69 - 10.65)                | 17 | 0.4060            | 17.7305             | 0.90           | 0.68 ± 0.05                     |
| β-pinene        | 8.52 (6.61 - 9.76)                 | 18 | 0.0661            | 27.7428             | 0.66           | 0.90 ± 0.15                     |
| β-ocimene       | 12.81 (11.84 - 13.72)              | 22 | 0.9044            | 13.9184             | 0.85           | 1.61 ± 0.14                     |

LD<sub>50</sub> = lethal doses causing 50% of mortality of insects; 95% CI = confidence interval with 95% of probability;

DF = degrees of freedom; Prob. = probability chi-square; R<sup>2</sup> = coefficient of determination; SEM = standard error.

**Table S2.** Lethal doses (LD<sub>50</sub>) with confidence intervals for binary mixtures tested to *S. frugiperda* third instar larvae.

| Binary mixtures                            | LD <sub>50</sub> (95% CI)<br>(ppm) | DF        | Prob.<br>$\chi^2$ | Pearson<br>$\chi^2$ | R <sup>2</sup> | Angular<br>Coefficient<br>± SEM |
|--------------------------------------------|------------------------------------|-----------|-------------------|---------------------|----------------|---------------------------------|
| dillapiole (0,3%) + β-caryophyllene (2,1%) | 0.03 (0.02 - 0.05)                 | 28        | 0.8542            | 20.2750             | 0.85           | 0.26 ± 0.02                     |
| Dillapiole (0,3%) + methyl eugenol (0,2%)  | 0.05 (0.04 - 0.06)                 | 22        | 1.6690            | 28.2693             | 0.85           | 0.62 ± 0.05                     |
| dillapiole (0,3%) + α-humulene (3,1%)      | 0.05 (0.04 - 0.06)                 | 22        | 0.8690            | 14.8408             | 0.89           | 0.52 ± 0.04                     |
| dillapiole (0,3%) + safrole (1,6%)         | 0.06 (0.04 - 0.10)                 | 26        | 0.9123            | 16.8910             | 0.74           | 0.27 ± 0.03                     |
| dillapiole (0,3%) + myristicin (0,5%)      | 0.06 (0.05 - 0.09)                 | 22        | 0.9887            | 9.7158              | 0.87           | 0.50 ± 0.04                     |
| dillapiole (0,3%) + pentadecane (2,9%)     | 0.09 (0.07 - 0.11)                 | 26        | 0.1261            | 34.3629             | 0.72           | 0.58 ± 0.07                     |
| dillapiole (0,3%) + heptadecane (1,1%)     | 0.10 (0.08 - 0.11)                 | 22        | 0.6245            | 19.3366             | 0.86           | 1.08 ± 0.09                     |
| dillapiole (0,3%) + limonene (0,6 %)       | 0.12 (0.10 - 0.14)                 | 22        | 0.8088            | 16.1412             | 0.83           | 0.90 ± 0.09                     |
| dillapiole (0,3%) + 1,8 cineole (2,2%)     | 0.15 (0.13 - 0.17)                 | 22        | 0.9257            | 13.2597             | 0.83           | 0.95 ± 0.09                     |
| dillapiole (0,3%) + β-ocimene (10,3%)      | 0.17 (0.12 - 0.21)                 | 22        | 0.9066            | 13.8542             | 0.84           | 0.66 ± 0.06                     |
| dillapiole (0,3%) + linalool (1,8%)        | 0.17 (0.15 - 0.20)                 | 30        | 0.1910            | 36.5375             | 0.71           | 0.83 ± 0.10                     |
| dillapiole (0,3%) + tetradecanol (1,2%)    | 0.21 (0.19 - 0.25)                 | 14        | 0.1258            | 20.1389             | 0.71           | 1.17 ± 0.20                     |
| dillapiole (0,3%) + aromadendrene (2,2%)   | 0.21 (0.20 - 0.23)                 | 14        | 0.6326            | 11.6721             | 0.81           | 2.14 ± 0.28                     |
| dillapiole (0,3%) + asaricin (0,2%)        | 0.34 (0.28 - 0.42)                 | 17        | 0.7140            | 13.3269             | 0.88           | 0.69 ± 0.06                     |
| <b>pure dillapiole</b>                     | <b>0.35 (0.29 - 0.40)</b>          | <b>22</b> | <b>0.7040</b>     | <b>18.0332</b>      | <b>0.72</b>    | <b>1.17 ± 0.15</b>              |
| dillapiole (0,3%) + α-pinene (4,7%)        | 0.42 (0.34 - 0.53)                 | 20        | 0.3115            | 22.5492             | 0.80           | 0.58 ± 0.06                     |
| dillapiole (0,3%) + β-pinene (6,5%)        | 0.44 (0.30 - 0.46)                 | 17        | 0.1183            | 24.0415             | 0.69           | 0.36 ± 0.06                     |

LD<sub>50</sub> = lethal doses causing 50% of mortality of insects; 95% CI = confidence interval with 95% of probability;

DF = degrees of freedom; Prob. = probability chi-square; R<sup>2</sup> = coefficient of determination; SEM = standard error.
